1  
2  
3  
4  
5  
6  
7  
8  
9  
10  
11  
12  
13  
14  
15  
16  
17  
18  
19  
20  
21  
22  
23  
24

**FULL TITLE: Malaria prevention in the age of climate change: A community survey in rural Senegal**

**SHORT TITLE: Malaria prevention survey in rural Senegal**

**Andrew C.L. Sherman<sup>1,2\*</sup>, Jesse D. Matthews<sup>3,4</sup>, C. Andrew Aligne<sup>1</sup>**

**<sup>1</sup> University of Rochester Medical Center Department of Pediatrics and Hoekelman Center, Rochester, New York, United States of America**

**<sup>2</sup> Netlife, Fairport, New York, United States of America**

**<sup>3</sup> St. Charles Medical Center, Bend, Oregon, United States of America**

**<sup>4</sup> Swedish Heath Services, Seattle, Washington, United States of America**

**\* Corresponding author**

**E-mail: [shermaac@gmail.com](mailto:shermaac@gmail.com) (AS)**

## 25 **Abstract**

## 26 **Background**

27 Malaria results in over 600,000 deaths per year, with 95 percent of all cases occurring in sub-Saharan  
28 Africa. Despite significant steady reductions from 2000 to 2015, there has been a recent resurgence. The  
29 estimated 2025 Africa death rate was recalculated to be 51.8 people per 100,000, whereas the previous  
30 estimate was 15.9. A potential explanation for this very significant setback is that increasing  
31 temperatures associated with global warming have made it more difficult to use insecticide treated  
32 mosquito nets. This study evaluated a rural west African population to determine barriers to mosquito  
33 net use, including heat and outdoor sleeping.

## 34 **Methods**

35 This study used a social ecological framework used by the Peace Corps to determine this community's  
36 barriers to malaria prevention. We practiced community-based participatory research by developing and  
37 implementing a survey in rural southeast Senegal. Local village health workers were trained specifically  
38 to implement this survey. Observations of the mosquito nets and sleeping spaces were performed by  
39 surveyors. 164 households in 20 villages were surveyed from October to November of 2012.

## 40 **Results**

41 164 of 164 selected households were surveyed, giving a 100% response rate, representing 21% of this  
42 local population. For the 1806 family members, respondents assessed a total need of 1565 nets,  
43 implying that each individual in this area needs 0.86 nets (95% CI: 0.77-0.95). The main reasons for not  
44 using an available net were heat and fragility of the nets. This population had very positive attitudes  
45 regarding mosquito nets and appreciated the work of local malaria educators.

## 46 **Conclusions**

47 The estimated need of 0.86 nets per person is 54% higher than the World Health Organization  
48 recommendation. Heat was found to be a major barrier in using a mosquito net, causing more people to  
49 sleep on outdoor structures. This study's findings suggest the ratio of nets to people may need to be  
50 adjusted for the substantial increase in outdoor sleeping. Head of household responses in this  
51 population were found to have no systemic bias and would be an accurate way to assess a family's need  
52 of nets. Deploying more malaria educators to this area would be appreciated and beneficial.

53

54

## 55 Introduction

56 Malaria results in over 600,000 deaths per year globally. Approximately 95 percent of all  
57 malaria cases and deaths occur in sub-Saharan Africa, with 80% of those deaths in children under 5  
58 years of age. Despite significant steady reductions from 2000 to 2015, there has been a recent  
59 resurgence. The estimated 2025 Africa death rate is now 51.8 people per 100,000, whereas the previous  
60 estimate for 2025 was 15.9 [1].

61 One potential explanation for this catastrophic setback is that increasing temperatures  
62 associated with global warming have made it more difficult to use insecticide treated mosquito nets  
63 (ITN), a proven strategy in the fight against malaria. Based on our experiences in villages in Senegal, we  
64 hypothesized that we would find that many people in rural areas spend considerable time sleeping  
65 outdoors, where it is somewhat cooler than inside their huts. Standard ITNs are designed for indoor use,  
66 so people sleeping outside generally lack protection from mosquito bites.

67 The goal of the study was to identify social and environmental factors that could be impeding  
68 malaria control by diminishing effective net usage. In addition to outdoor sleeping, we considered the  
69 knowledge and perceptions of malaria and ITNs, and community health priorities.

70

## 71 **Materials and methods**

72           This study used a framework (Fig 1) used by the Peace Corps specifically to look at malaria  
73 control in rural sub-Saharan Africa [2]. This framework combines important aspects of previous models  
74 and incorporates a state of sustainability [3]. The Peace Corps framework has potential to guide  
75 effective interventions, based on a community's assessment of barriers to regular ITN use.

76

77

78 **Fig 1. Study Theoretical Model.** Adapted from McLaughlin and Peace Corps. This model integrates  
79 important social ecological factors and applies them to rural Senegal malaria prevention.

80

81

82           We practiced community-based participatory research by incorporating local stakeholders into  
83 the research team. Input from these community members informed the study's design,  
84 implementation, analysis and interpretation. Our survey questions were adapted from the 2008-2009  
85 Senegal Malaria Indicator Survey [4]. A range of open-ended questions were added to the survey to  
86 assess key components of behavior, with special attention to barriers of ITN use. The study questions  
87 reported here asked about the number of nets needed for everyone in a household to sleep under one,  
88 the motivations for people to use their nets, the reasons people may not use nets, ways the nets could  
89 be modified to improve use, other ways people believe malaria could be prevented, and possible  
90 opportunities for community level interventions to promote the use of ITNs. We also encouraged the  
91 surveyors to include observations and relevant comments on the survey. Survey questions are available  
92 for review in the appendix (S1-S3 Files).

93

## 94 **Study population**

95           This study was conducted in the rural region of Kedougou (12.32° N, 12.18° W), located in the  
96 southeast corner of Senegal. The population of Senegal is 18 million, and the population of Kedougou is  
97 245,000 [5,6]. The rainy season extends from May to November [7]. Kedougou has a poverty rate of  
98 71.3% and an adult illiteracy rate of 58% [6]. Kedougou is composed of four sub-regions referred to as  
99 arrondissements. Our research focused on the arrondissement of Bandafassi and the 37 villages served  
100 by its health post (Fig 2). The village populations ranged from 30 to 952 people. This is a rural  
101 population, and most families have a livelihood of agriculture and cattle herding[5]. Over 95% of the  
102 population is Muslim, with the remaining practicing Christianity or animism [8]. The main ethnic groups  
103 in this sub-region are Peul, Mandinka, Bedik, and Bassari. French is taught throughout the school  
104 systems, so many residents communicate well in French. The average household size is larger than  
105 other areas in West Africa [9]. The standard household has 8 people and larger “collective” families  
106 average more than 15 people [5,6]. This area was selected because it has been a zone of high malaria  
107 morbidity and mortality.

108

109

110 **Fig 2. Map of the 37 Villages served by the Bandafassi health post in southeast Senegal.** Black  
111 diamonds were selected villages. Small circles were unselected villages. Stars indicate a source of  
112 staffed health care access. (QGIS 2.4.0)

113

## 114 **Sampling and data collection**

115           The study acquired preliminary census data from the Bandafassi health post to determine village  
116 population size. To confirm current population numbers, we also obtained village census data from  
117 each of the village chiefs served by the Bandafassi health post. We performed a simple random sample  
118 to select households, using a random number generator (Random~Number, PocketLab). We selected  
119 between 4 and 20 households per village, or between 15 to 33% of all households, depending on the  
120 size and location of the village. In all, we selected 164 households from 20 villages. Each questionnaire  
121 was labeled with a random unique identifier number.

122           In Senegal, the research team met with the coordinating Bandafassi health post nurse, as well as  
123 the village chiefs from sampled villages. The village chiefs agreed to partner with the study team,  
124 providing up-to-date census data and verification that questionnaires were properly administered by the  
125 surveyors.

126           The questionnaire was piloted in a village that was not part of the study sample. Based on  
127 feedback from piloting the survey, we adapted the questionnaire for local comprehension and cultural  
128 relevance. The study used local surveyors, recommended by the health post nurse, to administer the  
129 survey. Surveyors were selected based on their experience with similar surveys and their bilingualism in  
130 French and a local language. The study employed eleven surveyors – 7 men and 4 women. The research  
131 team and health post nurse developed a training curriculum for the surveyors. After the training, the  
132 surveyors demonstrated enhanced abilities to implement the questionnaire in a culturally sensitive  
133 manner.

134           The surveyors conducted 164 structured interviews between October 31<sup>st</sup> and November 30<sup>th</sup> of  
135 2012. Data collection coincided with the last months of the rainy season, when at-risk people could  
136 have been decreasing their net use. Surveyors were assigned to villages according to their language  
137 skills. Surveys were conducted in the homes of participants and directed at the heads of households,  
138 with input from available family members. Participants were not paid.

139

## 140 **Data analysis**

141           Surveyors recorded responses for each questionnaire verbatim in the language used by the  
142 participant. If a response was in a local language, the multilingual interviewer would immediately  
143 translate and write the response again in French. Translations were made from French to English by a  
144 bilingual research team member. English translations were transcribed into a REDCap interface. For  
145 descriptive analysis of responses to open-ended questions, three researchers reviewed all responses  
146 and came to a consensus on which categorical codes best represented the response themes. The codes  
147 were also chosen based on their potential to reflect known categories of ITN-use barriers and the  
148 themes of the selected theoretical framework (Fig 1). Analysis was used to address the gaps in the  
149 present literature, specifically the knowledge, perceptions and cues to action of ITN use. Four  
150 independent researchers assigned codes for each survey response. The team discussed disagreements  
151 until a consensus interpretation was agreed upon.

152           A section designed to quantify family members and sleeping spaces from the head of the  
153 household and surveyor observations was also evaluated. The research team made field observations of  
154 mosquito nets and village beds. Surveyors were instructed to estimate that one ITN was needed for  
155 each sleeping space. Members took detailed notes on these observations, and then repeatedly met to  
156 discuss possible interpretations. Senegalese members of the research team verified interpretations  
157 within the context of the local culture. Incomplete responses were excluded from the analysis.

158

## 159 **Ethical considerations**

160           The University of Rochester Research Subjects Review Board approved this project. The  
161 Bandafassi health post administration approved and partnered with this project for the training of the

162 surveyors. We met with all village chiefs of the selected villages, and they approved of this project.

163 Each participant gave verbal consent before the questionnaire. No personal identifiers were recorded.

164

## 165 **Results**

166 164 of the 164 selected households were successfully surveyed, giving a 100% response. Most

167 individual questions had responses over 96%. The question with the lowest response had a 93%

168 response. The 164 households represented 1806 people or about 21% of the total population of the

169 Bandafassi region. 152 heads of household gave updated information on household size.

170 The 20 selected villages were an average of 9.7 kilometers away from the nearest staffed health

171 care access. The average distance from health care access for all 37 area villages was 9.3 kilometers.

172 The 20 selected villages had an average population of 350 people. The average population of all 37 area

173 villages was 235 people. The average household size was 11.9 people.

174

### 175 **Perceived need for nets**

176 97.6% of households had access to at least one net. For the 1806 family members, respondents

177 assessed a total need of 1565 nets. This implies that each individual needs 0.86 nets (95% CI: 0.77 –

178 0.95), i.e. the 12,441 people in this region need a total of 10,678 nets.

179

### 180 **Barriers to optimal net utilization and malaria control**

#### 181 **Heat**

182 When asked “When you think about mosquito nets, what do you dislike about them?”

183 heat or lack of airflow was commonly discussed.



184 *'When the weather is hot, it keeps the air from getting through and makes it*  
185 *hard to sleep comfortably.'*

186 *'...sometimes one has the impression of sleeping in a hole.'*

187 *'[T]he mosquito nets make it hot and suffocate us.'*

188 When asked "There are people that do not use a mosquito net every day. In your  
189 opinion, why do these people not use a net every day?" a respondent discussed the mosquito  
190 net's effect on airflow:

191 *'During the hot weather, some people say that the mosquito net makes it even*  
192 *hotter.'*

193 When asked "How could the mosquito net be improved?" another respondent  
194 discussed how outdoor sleeping can cause accelerated damage of nets:

195 *'If it's in the room set up properly under the mattress then it will be fine. But if*  
196 *it's outside with the beds that don't have mattresses, then it will deteriorate*  
197 *quickly.'*

198 When asked if they had anything to add, this respondent discussed a sense of  
199 vulnerability with being outside in the evening:

200 *'Mosquito nets are effective. Except that when we are outside before going to*  
201 *bed, the mosquitos that bite us give us malaria.'*

202 A surveyor observed situations where children were vulnerable during outdoor sleeping:

203 *'There were miradors [elevated sleeping platforms] outside but no mosquito*  
204 *nets. Some children were sleeping there. Others on the other hand were*  
205 *sleeping inside where all the beds had nets hanging.'*

206 **ITN fragility**

207 A majority of respondents described ITN fragility as a reason for needing more nets. When  
208 asked: “How could the mosquito net be improved?” 62.8% of respondents discussed a need for  
209 increased durability:

210 *‘They need to be made tougher and longer-lasting.’*

211 *‘We have cots made of pleated wooden slats; we would like the nets to be improved so*  
212 *that they are more appropriate for our beds.’*

213 Also, when asked: “Are all the mosquito nets you received at the last distribution still here?”  
214 23.7% said no. When a follow up question asked: “What happened to the other nets?” 69.1%  
215 mentioned damage.

216 Some respondents suggested improvements with ITN design. Many of these ideas involved  
217 reducing ITN damage by customizing them to the needs and preferences of the population:

218 *‘We would like mosquito nets that have doors so that if someone or something comes*  
219 *into my pasture to attack my animals that I might be able to leave easily to go to their*  
220 *rescue.’*

## 221 **Overwashing**

222 When asked what happened to the missing nets, respondents described concerns about how  
223 the washing process could damage the nets:

224 *‘The mosquito nets lasted, but then got ruined. The women wash them and dry them*  
225 *under the hot sun and so they wind up getting ripped.’*

226 Regarding the drying process, nets “should be stored properly in dry season”, and after washing:  
227 *‘...they shouldn't be hung up on wood.’* When asked “How could the mosquito net be improved?” 22%  
228 of respondents mentioned washing the net. Respondents regularly emphasized the importance of  
229 cleanliness, which was often linked to increased rates of net washing:

230 *‘If the mosquito net is dirty, we wash it and hang it back up.’*

231           Some respondents viewed the chemicals as something that causes illness and thus needed to be  
232 cleaned or removed:

233           *‘There are mosquito nets that have an odor that causes colds, so we wash them before using*  
234 *them.’*

235

## 236 **Isolation from health services**

237           Respondents reflected on how they are far from health care services. The distance to a health  
238 care provider was commonly mentioned. At the end of the survey, a respondent was asked if he wanted  
239 to add any other comments:

240           *‘To travel to the other villages when somebody is gravely ill, you can imagine is very*  
241 *risky.’*

242 Surveyors from this region regularly discussed the burdens of disease and the lack of health care access:

243           *‘These people are really exhausted from going from village to village to get access to*  
244 *care or even just to get medical information.’*

245           *‘We need someone to come and help the people who live far from the city because they*  
246 *face enormous barriers to receiving care and they need to be educated on how not to get*  
247 *sick.’*

248

## 249 **Facilitators of net usage and malaria control**

### 250 **Acceptability of community malaria educators**

251           When discussing other community priorities, participants often valued the role of education.

252           When asked “If there were health aides who were trained to help solve problems with mosquito nets

253 and malaria in general would you be interested in having someone come to the household to help you?”

254 98.2% said yes. 91.3% thought this malaria educator should visit their homes two or more times a year.  
255 52.8% thought they should visit 4 or more times a year, regularly suggesting even more frequent visits  
256 from “*three times during the rainy season*” to “*all the time*”.

257 Here, a respondent shows an appreciation for this study’s survey as an anti-malaria  
258 intervention, also demonstrating how past education has improved the local knowledge base:

259 *‘I am very happy about this visit that is very important for us. It is a great pleasure to*  
260 *see you in my house to do something about this mosquito problem ... Mosquito nets*  
261 *protect us from mosquitoes, which give us malaria. Malaria is a very serious disease*  
262 *transmitted by the female of a mosquito called anopheles.’*

263 When asked “In your opinion, what do you think the people of the village could do to prevent  
264 more cases of malaria? You can talk about things other than mosquito nets”, education was discussed  
265 regularly:

266 *‘What the people of the village could do to help prevent malaria is to organize*  
267 *educational sessions and conversations all the time.’*

268 *‘The people of the village need to organize ... discussions on malaria and ways to prevent*  
269 *it.’*

270 *‘We should have conversations every month, if that's possible. Especially before, during,*  
271 *and after the rainy season.’*

## 273 **Acceptability of ITNs**

274 When asked “When you think about mosquito nets, what do you like about them?” 100% of  
275 respondents expressed positive attitudes toward nets, including protective benefits and comfort. They  
276 also gave examples of perceived risks of malaria:

277 *'[The net] protects our health a lot. If you sleep under a mosquito net, you will not get*  
278 *bitten by a mosquito or other insects. It decreases dust. It is very important because it*  
279 *protects us against lots of diseases.'*  
280 *'[H]anging up mosquito nets is better than having to throw away all of one's money on*  
281 *prescriptions.'*  
282 *'If we didn't have mosquito nets, we would have people falling ill all the time; that is why*  
283 *I always tell the children to lower the mosquito nets when they go to bed.'*

284 When asked "There are people that do not use a mosquito net every day. In your opinion, why  
285 do these people not use a net every day?" 63.1% mentioned the words "negligence or ignorance":

286 *'People who don't use a mosquito net every day in my opinion are people who don't*  
287 *know the risks they are taking.'*

288 *'People who do not use mosquito nets every day, in my opinion, it is because of laziness*  
289 *or negligence...'*

290 Respondents also had trouble imagining or explaining why people who live in their culture  
291 would not use a net:

292 *'In my opinion, it is the Westerners who do not use mosquito nets. In Africa, there's no*  
293 *way to live without insecticide.'*

294 *'I never heard anyone here say that they dislike mosquito nets.'*

295

## 296 **Suggestions from the community**

297 When asked about possible community actions to reduce malaria, interventions about cleaning  
298 were by far the most common response (60.4%).

299 *'The people of the village could help with the prevention of malaria by cleaning up the*  
300 *village properly.'*

301 *'The village residents must organize themselves to fight against filth...'*  
302 *'Avoid pools of stagnant water, destroying them during the rainy season. Everything*  
303 *that could contain water or otherwise bring mosquitoes should be destroyed.'*

304

## 305 **Discussion**

306 In a rural Senegalese population with a high malaria burden, our survey found a need of 0.86  
307 nets per person. This is 54% higher than the current WHO recommendation of 0.56 nets per person [10].  
308 The WHO recommendation for the number of nets per person has existed since 2010. The WHO  
309 suggests the "ratio can be adjusted as needed if there are data that support such adjustment"[11]. It has  
310 been suggested that the ratio calculation may need to be adjusted for the early damage of nets and its  
311 effect on ITN retention. This study's findings suggests that the ratio should be adjusted further to  
312 account for the substantial and increasing degree of outdoor sleeping: to prevent malaria deaths,  
313 people need more nets than they are currently receiving. We believe this troubling finding is valid.

314 A major strength of this study is that the lead researcher lived in this area as a Peace Corps  
315 volunteer and established positive relationships with community leaders. These connections continued  
316 for many years via the public health work of the non-profit organization, Netlife. These past  
317 partnerships and the use of local languages helped create a strong, multifaceted study team. Survey  
318 piloting helped greatly to create a culturally accepted final version. The trust from these past  
319 relationships and the culturally sensitive administration of the surveys contributed to the 100%  
320 response.

321 The flipside of these relationships is that, as with any survey, there is the risk that participants  
322 will try to please the interviewer with their responses. However, we found many responses with  
323 negative impressions of nets, indicating a balanced impression. Another potential limitation is that our

324 data for the number of nets needed by families was based on the head of household’s assessment. This  
325 is not as objective as counting all household members and sleeping spaces. There can be a concern that  
326 heads of household will ask for more nets than necessary. To address this, we analyzed a subset of  
327 open-ended responses from the surveyors. The surveyors had an option to write down observations of  
328 the sleeping areas. This wasn’t done by all the surveyors, but the responses that were documented  
329 helped to compare the number of requested nets versus the number of observed and verified sleeping  
330 spaces.

331 As the quotes below illustrate, observations by surveyors indicated that some villagers  
332 underestimated their need for nets, while others overestimated

333 In the first example, the surveyor’s observation suggests that there are 17 total sleeping spaces  
334 here, and the head of household stated a total need for only eight nets; this is therefore an  
335 underestimate.

336 ‘[The head of household] has 9 inside beds with mosquito nets, of which 5 are hung up,  
337 3 torn and 2 repaired. On the interior floor, there are 5 [sleeping spaces] that don’t have  
338 mosquito nets. Outside are 3 beds without mosquito nets.’

339 In contrast, the next example illustrates a head of household assessing a need for seven nets,  
340 whereas only three sleeping spaces were observed, thus suggesting an overestimate.

341 ‘[The head of the household] *has a very well organized and very knowledgeable family*  
342 *since they answered all the questions easily and the house is very tidy. There are 3*  
343 *interior beds all of which have mosquito nets hanging and the mosquito nets are not*  
344 *torn.*’

345

346 Overall, these responses showed some underestimates, some overestimates and many  
347 appropriate estimates of requested nets. So, we found there was no systematic bias of heads of  
348 household overestimating their families' ITN needs.

349 Head of household assessment is a valuable tool in this population when it is hard to account for  
350 all household members and indoor/outdoor sleeping behaviors by briefly inspecting a home in the  
351 daytime. A head of household will know how members move from bed to bed within the family and its  
352 environment.

353 Another potential limitation is that our survey was conducted in 2012 and so could now be  
354 outdated. However, members of our team have visited these villages multiple times since then (as  
355 recently as 2023), and if anything, the situation with heat and outdoor sleeping has become more  
356 pronounced, and we believe it now requires urgent attention. We have made regular observations of  
357 outdoor sleeping. Most household compounds have outdoor structures used during the day for shade  
358 or for food preparation. During the evenings, many family members drink tea and talk on these  
359 structures. Because of the heat, many people prefer to sleep the first part of the night outdoors,  
360 because there is better airflow outdoors than in the huts. When cool enough, most family members  
361 wake up and move to the sleeping spaces inside the huts. Regularly, family members would sleep one-  
362 third to one-half of the night outside. Although we observed mosquito nets being used on some  
363 outdoor structures (S1-S4 Figs), this was rare. Most household members only have enough nets for  
364 their indoor sleeping spaces.

365 Because outdoor sleeping increases the number of sleeping spaces used by each family, it  
366 increases the number of nets needed to provide protection from mosquitos. In addition, if nets are used  
367 outside, they wear out faster. For example, the structures used for outdoor sleeping tend to have many  
368 sharp points, and nighttime winds cause the nets to regularly catch on these points. (S4 File) Very few



369 ITNs are truly designed for outdoor spaces [12,13]. Consistent with Killeen and Grand Challenges in  
370 Global Health, this study supports the need to expand interventions to the outdoors [13,14].

371 Prior to this survey, few studies had specifically investigated outdoor sleeping as a barrier to ITN  
372 use. Studies conducted near Lake Victoria and in Burkina Faso found that outdoor sleeping was  
373 infrequent [15,16]. In contrast, we found outdoor sleeping to be extremely prevalent, consistent with  
374 reports from Niger and Iran [17,18]. Heat has been found to be a significant barrier to ITN use, and  
375 causes this study population to regularly sleep outside [19–22].

376 As in previous studies, this population demonstrates concerns about the durability of nets [23–  
377 27]. Study responses and our observations indicate that village bedframes often have jagged edges that  
378 increase the risk of rips in ITNs. When ITNs get dirty, people will wash the nets to improve their  
379 appearance in the home. However, some of the washing and drying techniques are abrasive and it is  
380 likely that many nets are overwashed. Previous studies verify that misunderstandings about ITN  
381 washing can damage the nets [28–32]. Future alterations of ITNs or community interventions that  
382 decrease over-washing will increase durability of the nets.

383 Although there is a large body of research that focuses on ITN uptake and ownership-to-use  
384 rates, there are few studies reporting on the development of ITNs as a social norm [3,19,33]. This  
385 study’s responses were saturated with positive comments about nets. Participants demonstrated  
386 knowledge about the deadly nature of malaria, the vulnerability to children, and the economic benefits  
387 of avoiding illness. When asked to come up with a reason people would not use a net every night, they  
388 often used the words “negligence” or “ignorance”. Research shows that when most members of a  
389 population shift to the disapproval of a previously common behavior, it represents a change in the social  
390 norm [34].

391 One factor in this level of success in community engagement to fight malaria is PECADOM PLUS  
392 (Prise en charge à domicile), which is a Senegalese Ministry of Health developed program that Peace

393 Corps volunteers have extended into the rural communities [35]. PECADOM PLUS uses the village health  
394 leaders in an early detection system of new malaria cases. Many villages now have designated malaria  
395 champions who have participated in vaccine campaigns, ITN distributions and educational sessions. In  
396 the past, community participation like this has been found to reduce disease burden, if the champions  
397 are provided with appropriate resources, training and supervision [36–40]. Maintaining a high level of  
398 community involvement is also very important to sustain high levels of ITN use where malaria rates are  
399 decreasing [41–43].

400

## 401 **Conclusions**

402 In a rural Senegalese population with a high malaria burden, our survey found a perceived need  
403 of 0.86 insecticide treated nets per person. This is 54% higher than the current WHO recommendation  
404 of 0.56 ITNs per person [10]. Moreover, our field observations indicated that the number of nets needed  
405 for adequate protection against malaria could be even greater.

406 One particular concern is global warming. Heat is a major barrier to the use of an available  
407 indoor mosquito net. Increases in temperature are likely to cause people to sleep on outdoor structures  
408 more often. If there is an increase in the already high prevalence of outdoor sleeping, then the number  
409 of needed nets will increase. We should provide more nets for people who sleep outside, and research  
410 should be conducted to develop modified nets more suitable for outdoor use. The reason people sleep  
411 outside is the heat, and this is likely to worsen with global warming. Therefore, it seems that efforts to  
412 decrease global CO<sub>2</sub> emissions would help with malaria control.

413 Fortunately, this study also highlighted the presence of many assets for fighting malaria in this  
414 hyperendemic region. The population is already very well informed about malaria, engaged in ITN usage,  
415 and eager to keep learning about malaria control. An existing program of community health workers is

416 well received. Thus, a feasible and acceptable intervention would be to deploy more local malaria  
417 champions who can provide regular educational updates on malaria and ITNs, identify and treat early  
418 cases of malaria, and empower communities by leading discussions on how local stakeholders can  
419 create and develop effective interventions. Increased malaria control services should especially be  
420 provided to families who live far from health posts or hospitals. Strengthening the village health worker  
421 network would be an inexpensive, highly effective method to reduce malaria deaths, as well as create an  
422 improved health care infrastructure to detect outbreaks of other diseases such as meningitis or Ebola.

423 This population places a high value on village cleanliness as a part of public health. It is  
424 therefore important to incorporate cleaning activities into community malaria interventions. With  
425 specific guidance, such programs could include activities like eliminating standing water, fixing doors or  
426 adding window screens, all of which would reduce the transmission of malaria. Hanging up ITNs as part  
427 of the home improvements and educating about over-washing would improve utility of the nets.

428 Implementation of the solutions suggested here should help accelerate the decline of malaria  
429 mortality in sub-Saharan Africa.

430

## 431 **Acknowledgments**

432 This work could not be done without the lifelong efforts of Bandafassi health post nurse, Mactar  
433 Mansaly. Thank you to all the assisting professionals at the University of Rochester Department of  
434 Pediatrics and the Hoekelman Center. Thank you to the Bandafassi area village health workers, the  
435 local Peace Corps Volunteers, the members of the Programme National de Lutte contre le Paludisme,  
436 and the Senegal Ministry of Health.

437

## 438 **References**

439

- 440 1. World Health Organization. World Malaria Report 2023, Geneva; 2023.
- 441 2. McLaughlin M. Theory of Malaria Prevention. A Malaria Boot Camp Presentation. Peace Corps. 2013.
- 442 Thies, Senegal
- 443 3. Panter-Brick C, Clarke SE, Lomas H, Pinder M, Lindsay SW. Culturally compelling strategies for
- 444 behaviour change: A social ecology model and case study in malaria prevention. Soc Sci Med. 2006.
- 445 Jun;62(11):2810–25. pmid:16352385
- 446 4. Ndiaye S, Ayad M. Sénégal Enquête Nationale sur le Paludisme 2008-2009 (ENPS-II). Calverton,
- 447 Maryland, USA: Ministère de la Santé, de la Prévention et de l'Hygiène [Sénégal] and ICF Macro, 2009
- 448 5. Agence Nationale de la Statistique et de la Démographie (ANSD). Cinquième Recensement Général de
- 449 la Population et de l'Habitat (RGPH-5) Rapport Preliminaire. Senegal: Ministère de l'Economie, du Plan
- 450 et de la Coopération, 2023
- 451 6. Agence Nationale de la Statistique et de la Démographie, (ANSD): Enquête Harmonisée sur les
- 452 Conditions de Vie des Ménages (EHCVM) au Sénégal RAPPORT FINAL. Senegal: Ministère de l'Economie,
- 453 du Plan et de la Coopération, 2021
- 454 7. World Bank Group: Data. Senegal. [Cited 18 June 2024]. Database: World Development Indicators
- 455 [Internet]. Available from: [https://data.worldbank.org/country/senegal#cp\\_cc](https://data.worldbank.org/country/senegal#cp_cc)
- 456 8. Central Intelligence Agency. The World Factbook: Senegal. [Cited 18 June 2024] Available from:
- 457 <https://www.cia.gov/the-world-factbook/countries/senegal/summaries>
- 458 9. Eisele T. P., Keating J., Littrell M., Larsen D., & Macintyre K. (2009). Assessment of insecticide-treated
- 459 bednet use among children and pregnant women across 15 countries using standardized national
- 460 surveys. Am J Trop Med Hyg: 209–214. pmid:19190215
- 461 10. World Health Organization. WHO guidelines for malaria, WHO/UCN/GMP/ 2023.01 Rev.1. Geneva;
- 462 2023.
- 463 11. Global Malaria Programme, World Health Organization. Revised recommendations for achieving
- 464 universal coverage with long-lasting insecticidal nets in malaria control. Malaria Policy Advisory Group
- 465 Meeting. 2017. Geneva.
- 466 12. Durnez L, Coosemans M. Residual Transmission of Malaria: An Old Issue for New Approaches.
- 467 Anopheles mosquitoes - New insights into malaria vectors. InTech; 2013. Available from:
- 468 <http://dx.doi.org/10.5772/55925>
- 469 13. Grand Challenges, Bill & Melinda Gates Foundation. Global Grand Challenges: Outdoor Malaria
- 470 Vector Control. 2022. Available from: [https://gcgh.grandchallenges.org/challenge/outdoor-malaria-](https://gcgh.grandchallenges.org/challenge/outdoor-malaria-vector-control)
- 471 [vector-control](https://gcgh.grandchallenges.org/challenge/outdoor-malaria-vector-control).
- 472 14. Killeen GF. Characterizing, controlling and eliminating residual malaria transmission. Malar J.
- 473 2014;13:330. pmid:25149656
- 474 15. Toé LP, Skovmand O, Dabiré KR, Diabaté A, Diallo Y, Guiguemdé TR, et al. Decreased motivation in
- 475 the use of insecticide-treated nets in a malaria endemic area in Burkina Faso. Malar J. 2009;8:175.
- 476 pmid:19640290

- 477 16. Iwashita H, Dida G, Futami K, Sonye G, Kaneko S, Horio M, et al. Sleeping arrangement and house  
478 structure affect bed net use in villages along Lake Victoria. *Malar J.* 2010;9(1):1–7. pmid:20569459
- 479 17. Galvin KT, Petford N, Ajose F, Davies D. An exploratory qualitative study on perceptions about  
480 mosquito bed nets in the Niger Delta: what are the barriers to sustained use? *J Multidiscip Healthc.*  
481 2011;4:73–83. pmid:21544249
- 482 18. Basseri HR, Abai MR, Raeisi A, Shahandeh K. Community sleeping pattern and anopheline biting in  
483 southeastern Iran: a country earmarked for malaria elimination. *Am J Trop Med Hyg.* 2012;87(3):499-  
484 503. pmid:22826491
- 485 19. Beer N, Ali AS, Eskilsson H, Jansson A, Abdul-Kadir FM, Rotllant-Estelrich G, et al. A qualitative study  
486 on caretakers' perceived need of bed-nets after reduced malaria transmission in Zanzibar, Tanzania.  
487 *BMC Public Health.* 2012;12:606. pmid:22863188
- 488 20. Pulford J, Hetzel MW, Bryant M, Siba PM, Mueller I. Reported reasons for not using a mosquito net  
489 when one is available: a review of the published literature. *Malar J.* 2011;10:83. pmid:21477376
- 490 21. Ahorlu CS, Adongo P, Koenker H, Zigirumugabe S, Sika-Bright S, Koka E, et al. Understanding the gap  
491 between access and use: A qualitative study on barriers and facilitators to insecticide-treated net use in  
492 Ghana. *Malar J.* 2019;18:417. pmid:31831004
- 493 22. Rek J, Musiime A, Zedi M, Otto G, Kyagamba P, Asimwe Rwatooro J, et al. Non-adherence to long-  
494 lasting insecticide treated bednet use following successful malaria control in Tororo, Uganda. *PloS one.*  
495 2020;15(12):e0243303. pmid:33270743
- 496 23. Gnanguenon V, Azondekon R, Oke-Agbo F, Beach R, Akogbeto M. Durability assessment results  
497 suggest a serviceable life of two, rather than three, years for the current long-lasting insecticidal  
498 (mosquito) net (LLIN) intervention in Benin. *BMC Infectious Diseases.* 2014;14(1). pmid:24507444
- 499 24. Hakizimana E, Cyubahiro B, Rukundo A, Kabayiza A, Mutabazi A, Raymond B, et al. Monitoring long-  
500 lasting insecticidal net (LLIN) durability to validate net serviceable life assumptions, in Rwanda. *Malar J.*  
501 2014; 13(344). pmid:25174414
- 502 25. Craig AS, Muleba M, Smith SC, Katebe-Sakala C, Chongwe G, Hamainza B, et al. Long-lasting  
503 insecticidal nets in Zambia: a cross-sectional analysis of net integrity and insecticide content. *Malar J.*  
504 2015; 14:239-8. pmid:26054336
- 505 26. Diouf EH, Diouf M, Dieme C, Swamidoss I, Ngom EHM, Senghor MW, et al. Evaluation of the residual  
506 efficacy and physical durability of five long-lasting insecticidal nets (LLINs) in Senegal. *Malar J.* 2022;  
507 21(1):210-6. pmid:35780153
- 508 27. Loll DK, Berthe S, Faye SL, Wone I, Arnold B, Koenker H et al. "You need to take care of it like you  
509 take care of your soul": perceptions and behaviours related to mosquito net damage, care, and repair in  
510 Senegal. *Malar J.* 2014; 13:322-322. pmid:25128021
- 511 28. Mutuku FM, Khambira M, Bisanzio D, Mungai P, Mwanzo I, Muchiri EM, et al. Physical condition and  
512 maintenance of mosquito bed nets in Kwale County, coastal Kenya. *Malar J.* 2013; 12(1):46.  
513 pmid:23374429

- 514 29. Lover AA, Sutton BA, Asy AJ, Wilder-smith A. An exploratory study of treated-bed nets in Timor-  
515 Leste: patterns of intended and alternative usage. *Malar J.* 2011;10:199. pmid:21777415
- 516 30. Atieli FK, Munga SO, Ofulla AV, Vulule JM. The effect of repeated washing of long-lasting insecticide-  
517 treated nets (LLINs) on the feeding success and survival rates of *Anopheles gambiae*. *Malar J.* 2010;  
518 9:304. pmid:21029477
- 519 31. Atieli FK, Munga SO, Ofulla AV, Vulule JM. Wash durability and optimal drying regimen of four  
520 brands of long-lasting insecticide-treated nets after repeated washing under tropical conditions. *Malar J.*  
521 2010; 9:248. pmid:20799996
- 522 32. Bauch J, Gu JJ, Msellem M, Mårtensson A, Ali AS, Gosling R, et al. Perception of malaria risk in a  
523 setting of reduced malaria transmission: a qualitative study in Zanzibar. *Malar J.* 2013;12:75.  
524 pmid:23433302
- 525 33. Dunn CE, Le Mare A, Makungu C. Malaria risk behaviours, socio-cultural practices and rural  
526 livelihoods in southern Tanzania: Implications for bednet usage. *Soc Sci Med.* 2011;72(3):408–17.  
527 pmid:21211875
- 528 34. Gutman M. *Social Norms and Attitudes About Smoking: 1991-2010*. Princeton, NJ: Robert Wood  
529 Johnson Foundation; 2011 April.
- 530 35. PECADOM Plus – Peace Corps Volunteers in Senegal Extend Malaria Case Management to the  
531 Community [Internet]. U.S. President’s Malaria Initiative; 2014 [cited 2024 Oct 8]. Available from:  
532 [https://www.pmi.gov/pecadom-plus-peace-corps-volunteers-in-senegal-extend-malaria-case-](https://www.pmi.gov/pecadom-plus-peace-corps-volunteers-in-senegal-extend-malaria-case-management-to-the-community/)  
533 [management-to-the-community/](https://www.pmi.gov/pecadom-plus-peace-corps-volunteers-in-senegal-extend-malaria-case-management-to-the-community/)
- 534 36. Okonofua F, Coplan P, Collins S, Oronsaye F, Ogunsakin D, Ogonor J, et al. Impact of an intervention  
535 to improve treatment-seeking behavior and prevent sexually transmitted diseases among Nigerian  
536 youths. *IJID.* 2003;7(1): 61–73. pmid:12718812
- 537 37. Atkinson JA, Vallely A, Fitzgerald L, Whittaker M, Tanner M. The architecture and effect of  
538 participation: a systematic review of community participation for communicable disease control and  
539 elimination. Implications for malaria elimination. *Malar J.* 2011;10:225. pmid: 21816085
- 540 38. Delacollette C, Van der Stuyft P, Molima K. Using community health workers for malaria control:  
541 experience in Zaire. *Bull World Heal Organ.* 1996;74(4):423–30. pmid:8823965
- 542 39. Hii JL, Chee KC, Vun YS, Awang J, Chin KH, Kan SK. Sustainability of a successful malaria surveillance  
543 and treatment program in a Runggus community in Sabah, east Malaysia. *Southeast Asian J Trop Med*  
544 *Public Health.* 1996;27:512–21. pmid:9185261
- 545 40. Kironde S, Kahirimbanyi M. Community participation in primary health care (PHC) programmes:  
546 Lessons from tuberculosis treatment delivery in South Africa. *Afr Health Sci.* 2002;2:16–23.  
547 pmid:12789110
- 548 41. Atkinson JA, Fitzgerald L, Toaliu H, Taleo G, Tynan A, Whittaker M, et al. Community participation for  
549 malaria elimination in Tafea Province, Vanuatu: Part I. Maintaining motivation for prevention practices  
550 in the context of disappearing disease. *Malar J.* 2010;9:93. pmid:20380748

551 42. Kaneko A. A community-directed strategy for sustainable malaria elimination on islands: short-term  
552 MDA integrated with ITNs and robust surveillance. *Acta Trop.* 2010;114: 177–83. pmid:20132788

553 43. Special Programme for Research & Training in Tropical Diseases. Community-directed interventions  
554 for major health problems in Africa: a multi-country study, final report. Switzerland: World Health  
555 Organization; 2008.

556

557

## 558 **Supporting information**

559 **S1 Fig. Children at shade structure.** An outdoor shade structure, used during the day for food  
560 preparation. In the evening, this structure was a hub for making tea and conversation. For the first half  
561 of the night, this structure was regularly used for sleeping.

562 **S2 Fig. Outdoor sleeping space.** A rare example of outdoor structures with mosquito nets. These  
563 elevated sleeping platforms were made with long wood sticks, which typically had sharp ends which  
564 catch and tear ITNs.

565 **S3 Fig. Boy by outdoor sleeping space.** Another example of a typical outdoor structure made with  
566 bamboo-like grass. Here, the sharp ends of this material are evident.

567 **S4 Fig. Outdoor structure used for food preparation.** This outdoor structure (left of the hut) was  
568 commonly used for drying grain on its top level. Its top level was made from a piece of local wooden  
569 fencing, also with sharp edges.

570 **S1 File. Survey tool (French).** After piloting, the French version of this study's survey was created.

571 **S2 File. Survey tool (English).** The English version of the survey, back translated from French.

572 **S3 File. Survey tool (Pulaar / Fulani).** The local language translation of the study survey.

573 **S4 File. Video outdoor sleeping.** Discussion of outdoor sleeping space usage

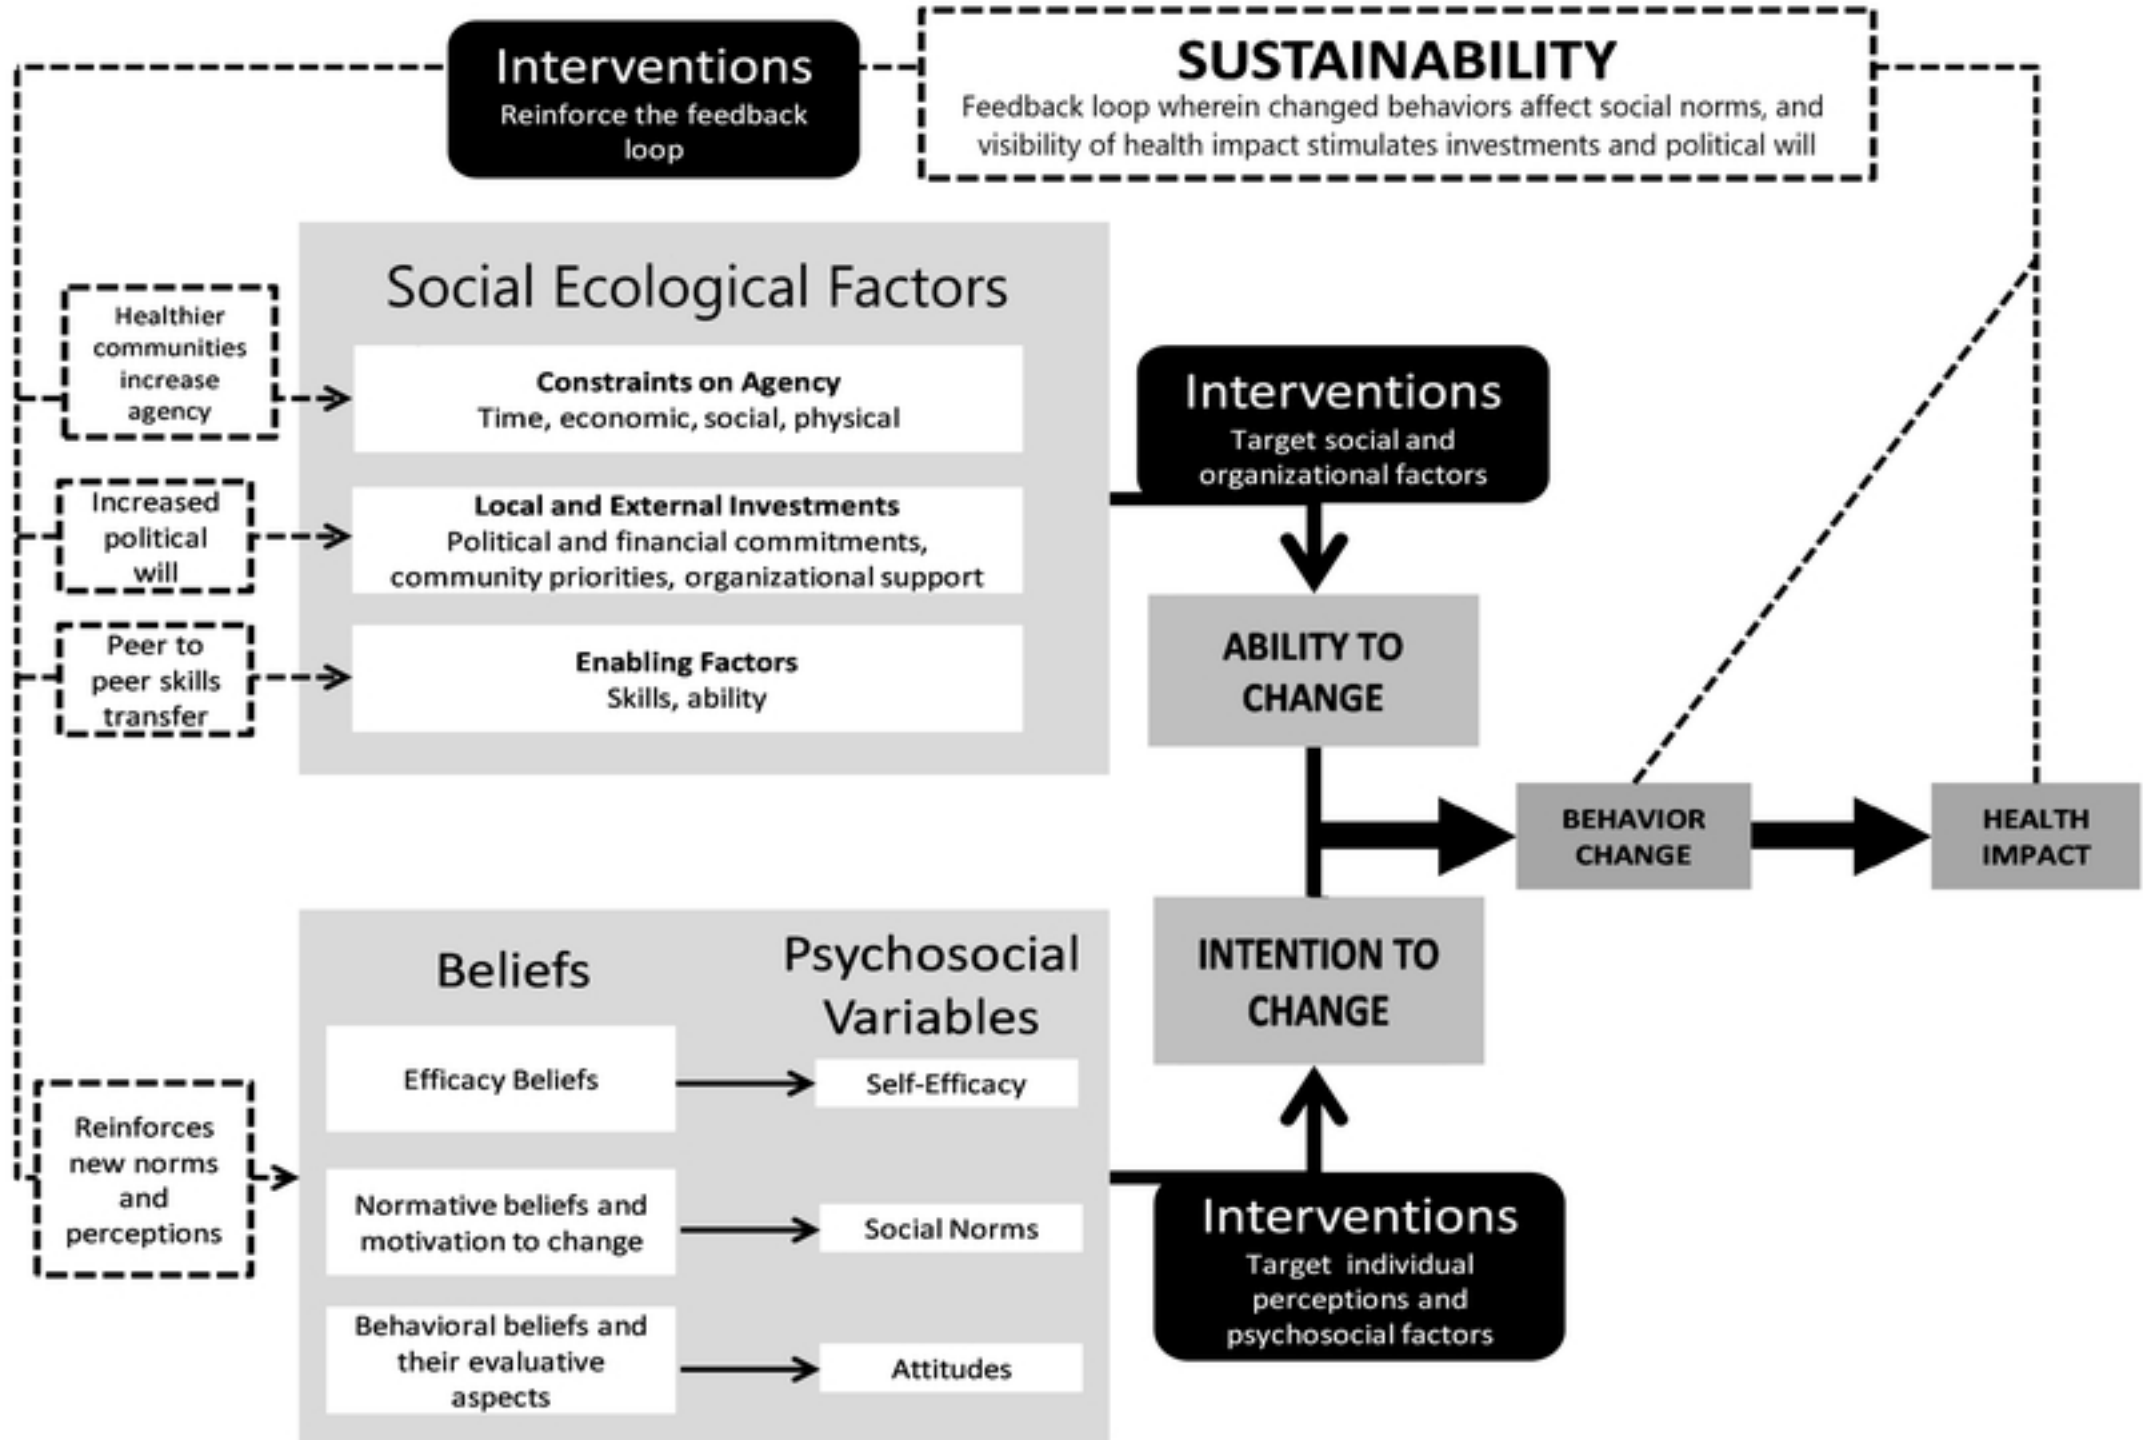

Fig 1



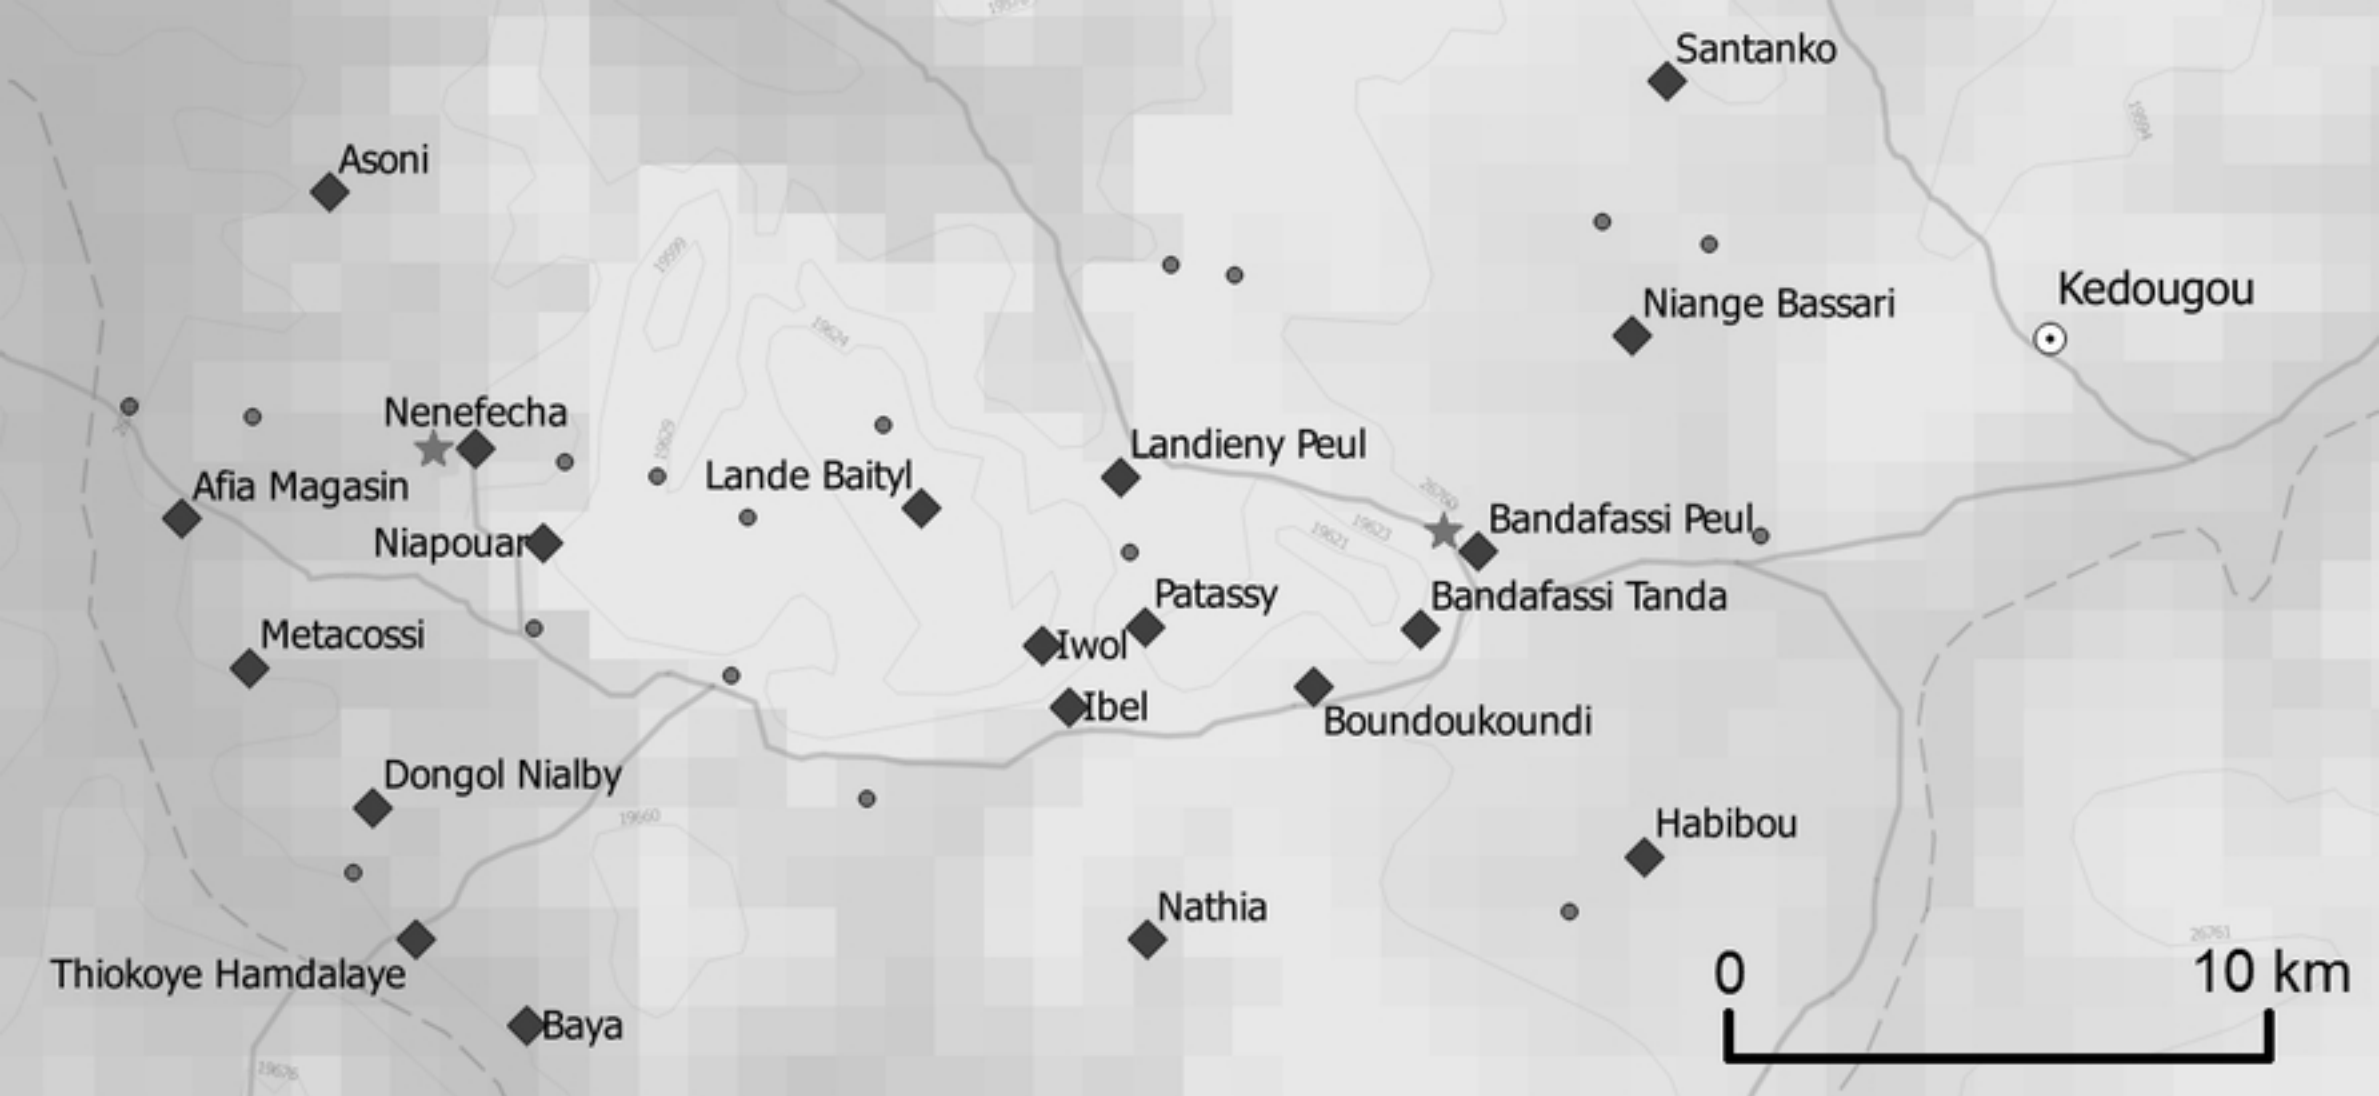

Fig 2
